# Supplementary material for: Structural codons: linearity/helicity interconversion by pyridine/pyrimidine exchange in molecular strandsElectronic supplementary information (ESI) available: spectroscopic (1H,13C-NMR, mass) data for compounds 6a,b; 7a,b and 8a,b. See http://www.rsc.org/suppdata/cc/b3/b311045a/
Source: Royal Society of Chemistry journal article supplement (doi:10.1039/b311045a), 2003-12-19
Supplement: b311045a.pdf [file b311045a.pdf]

## SPECTROSCOPIC DATA

**Compound 6a:** m. p. 327 °C; <sup>1</sup>H NMR (400 MHz, [D<sub>6</sub>]DMSO): δ = 9.96 (s, 2 H), 9.61 (s, 1 H), 8.63 (s, 1 H), 7.50 (t, <sup>3</sup>J = 8 Hz, 2 H), 7.40 (d, <sup>3</sup>J = 8 Hz, 2 H), 6.31 (d, <sup>3</sup>J = 8 Hz, 2 H), 6.11 (brs, 4 H); <sup>13</sup>C NMR (100 MHz, DMSO-*d*<sub>6</sub>): δ = 160.0, 159.5, 158.9, 157.9, 148.7, 139.8, 115.5, 105.6, 101.0; FAB-MS: *m/z* (%) 351.0 (100) [M+H]<sup>+</sup>.

**Compound 6b:** m. p. 251 °C (decomp.); <sup>1</sup>H NMR (400 MHz, CDCl<sub>3</sub>): δ = 10.07 (s, 2 H), 9.37 (d, <sup>5</sup>J = 1 Hz, 1 H), 9.03 (d, <sup>5</sup>J = 1 Hz, 1 H), 8.05-8.03 (m, 2 H), 7.79-7.73 (m, 4 H), 7.24 (s, 2 H); <sup>13</sup>C NMR (100 MHz, CDCl<sub>3</sub>): δ = 159.7, 158.7, 156.9, 152.1, 150.6, 148.4, 140.8, 116.4, 108.8, 108.6, 81.3, 28.2; FAB-MS: *m/z* (%) 551.1 (83) [M+H]<sup>+</sup>, 451.1 (16) [(M-Boc)+H]<sup>+</sup>, 351.1 (100) [(M-2Boc)+H]<sup>+</sup>.

**Compound 7a:** m. p. 230 °C (decomp.); <sup>1</sup>H NMR (200 MHz, CDCl<sub>3</sub>): δ = 10.23 (s, 2 H), 8.92 (s, 1 H), 8.64 (s, 2 H), 8.64-8.57 (m, 2 H), 7.63-7.60 (m, 3 H), 7.29 (s, 2 H), 3.11 (t, <sup>3</sup>J = 7 Hz, 4 H), 1.78-1.26 (m, 24 H), 1.57 (s, 18 H), 172.65 (t, <sup>3</sup>J = 7 Hz, 6 H); <sup>13</sup>C NMR (50 MHz, CDCl<sub>3</sub>): δ = 170.9, 163.9, 160.8, 159.4, 158.6, 157.1, 151.1, 134.7, 132.4, 129.1, 128.7, 114.3, 92.1, 82.5, 31.8, 30.8, 29.6, 29.2, 28.9, 28.1, 22.6, 14.1; FAB-MS: *m/z* (%) 917.4 (28) [M+H]<sup>+</sup>, 817.3 (8) [(M-Boc)+H]<sup>+</sup>, 717.2 (100) [(M-2Boc)+H]<sup>+</sup>.

**Compound 7b:** <sup>1</sup>H NMR (400 MHz, CDCl<sub>3</sub>): δ = 10.15 (s, 2 H), 9.40 (d, <sup>5</sup>J = 1 Hz, 1 H), 9.05 (s, <sup>5</sup>J = 1 Hz, 1 H), 8.59 (s, 2 H), 7.25 (s, 2 H), 3.10 (t, <sup>3</sup>J = 7 Hz, 4 H), 1.73-1.68 (m, 4 H), 1.56 (s, 18 H), 1.55-1.36 (m, 4 H), 1.35-1.25 (m, 16 H), 0.88 (t, <sup>3</sup>J = 7 Hz, 6 H); <sup>13</sup>C NMR (100 MHz, CDCl<sub>3</sub>): δ = 171.1, 160.4, 159.4, 158.2, 157.1, 157.0, 151.1, 116.7, 92.1, 82.5, 31.8, 30.7, 29.2, 29.1, 28.8, 28.1, 22.6, 14.1; FAB-MS: *m/z* (%) 841.4 (32) [M+H]<sup>+</sup>, 741.4 (12) [(M-Boc)+H]<sup>+</sup>, 641.3 (100) [(M-2Boc)+H]<sup>+</sup>.

**Compound 8a:** m. p. 266 °C; <sup>1</sup>H NMR (400 MHz, [D<sub>6</sub>]DMSO): δ = 11.41 (s, 2 H), 8.36-8.34 (m, 2 H), 8.30-8.26 (m, 1 H), 7.18 (s, 2 H), 7.02 (s, 4 H), 3.10 (q, <sup>3</sup>J = 7 Hz, 4 H), 1.32 (t, <sup>3</sup>J = 7 Hz, 6 H); <sup>13</sup>C NMR (100 MHz, [D<sub>6</sub>]DMSO): δ = 169.7, 165.4, 163.9, 156.7, 149.1, 140.2, 126.6, 88.5, 24.4, 15.4; MALDI-TOF (dithranol): *m/z* (%) 472.2 (100) [M+H]<sup>+</sup>.

**Compound 8b:** m. p. 183 °C (decomp.); <sup>1</sup>H NMR (200 MHz, CDCl<sub>3</sub>): δ = 10.31 (s, 2 H), 8.65 (s, 2 H), 8.54 (d, <sup>3</sup>J = 8 Hz, 2 H), 8.17 (t, <sup>3</sup>J = 8 Hz, 1 H), 7.19 (s, 2 H), 3.14 (t, <sup>3</sup>J = 7 Hz, 4 H), 1.79-1.68 (m, 4 H), 1.56 (s, 18 H), 1.52-1.26 (m, 20 H), 0.86 (t, <sup>3</sup>J = 7 Hz, 6 H); <sup>13</sup>C NMR (50 MHz, CDCl<sub>3</sub>): δ = 170.7, 162.2, 159.3, 158.0, 151.1, 148.1, 139.7, 126.5, 92.1, 82.3, 31.8, 30.8, 29.2, 29.1, 28.9, 28.1, 22.6, 14.1; FAB-MS: *m/z* (%) 840.4 (14) [*M*+H]<sup>+</sup>, 740.3 (4) [*M-Boc*]+H]<sup>+</sup>, 640.3 (100) [*M-2Boc*]+H]<sup>+</sup>.
